# Supplementary material for: From Epimedium to Neuroprotection: Exploring the Potential of Wushanicaritin
Source: MDPI journal article supplement (doi:10.3390/foods13101493), 2024-05-11
Supplement: s1 [file s1]

Table S1. The primer sequence used in the present study.

| Gene             | Primer sequence                                                      | Product size<br>(bp) |
|------------------|----------------------------------------------------------------------|----------------------|
| <i>SOD1</i>      | Forward: GCCGTGTGCGTGCTGAAGG<br>Reverse: ACAACTGGTTCACCGCTTGCC       | 80                   |
| <i>SOD2</i>      | Forward: GCTGGAGGCTATCAAGCGTGAC<br>Reverse: TTAGAGCAGGCGGCAATCTGTAAG | 147                  |
| <i>GPx1</i>      | Forward: AGGTCCAGACGGTGTTCAGTG<br>Reverse: TAGGGGTTGCTAGGCTGCTTGG    | 105                  |
| <i>CAT</i>       | Forward: CGCCTGGGACCAAATCTATCTGC<br>Reverse: TCTGGTGCGCTGAAGCTGTTG   | 146                  |
| <i>Bcl-2</i>     | Forward: GCCTGAGAGCAACCGAACGC<br>Reverse: AGGTGGCACAGGGCTGAGC        | 109                  |
| <i>Bax</i>       | Forward: CCAGGACGCATCCACCAAGAAG<br>Reverse: GCTGCCACACGGAAGAAGACC    | 138                  |
| <i>Caspase-3</i> | Forward: TTTGGAACGAACGGACCTGTGG<br>Reverse: ACCGCAGTCCAGCTCTGTACC    | 132                  |
| <i>Caspase-7</i> | Forward: TCCTGCTGAGCCACGGAGAAG<br>Reverse: CGGCACGCCTGGATGAAGAAG     | 142                  |

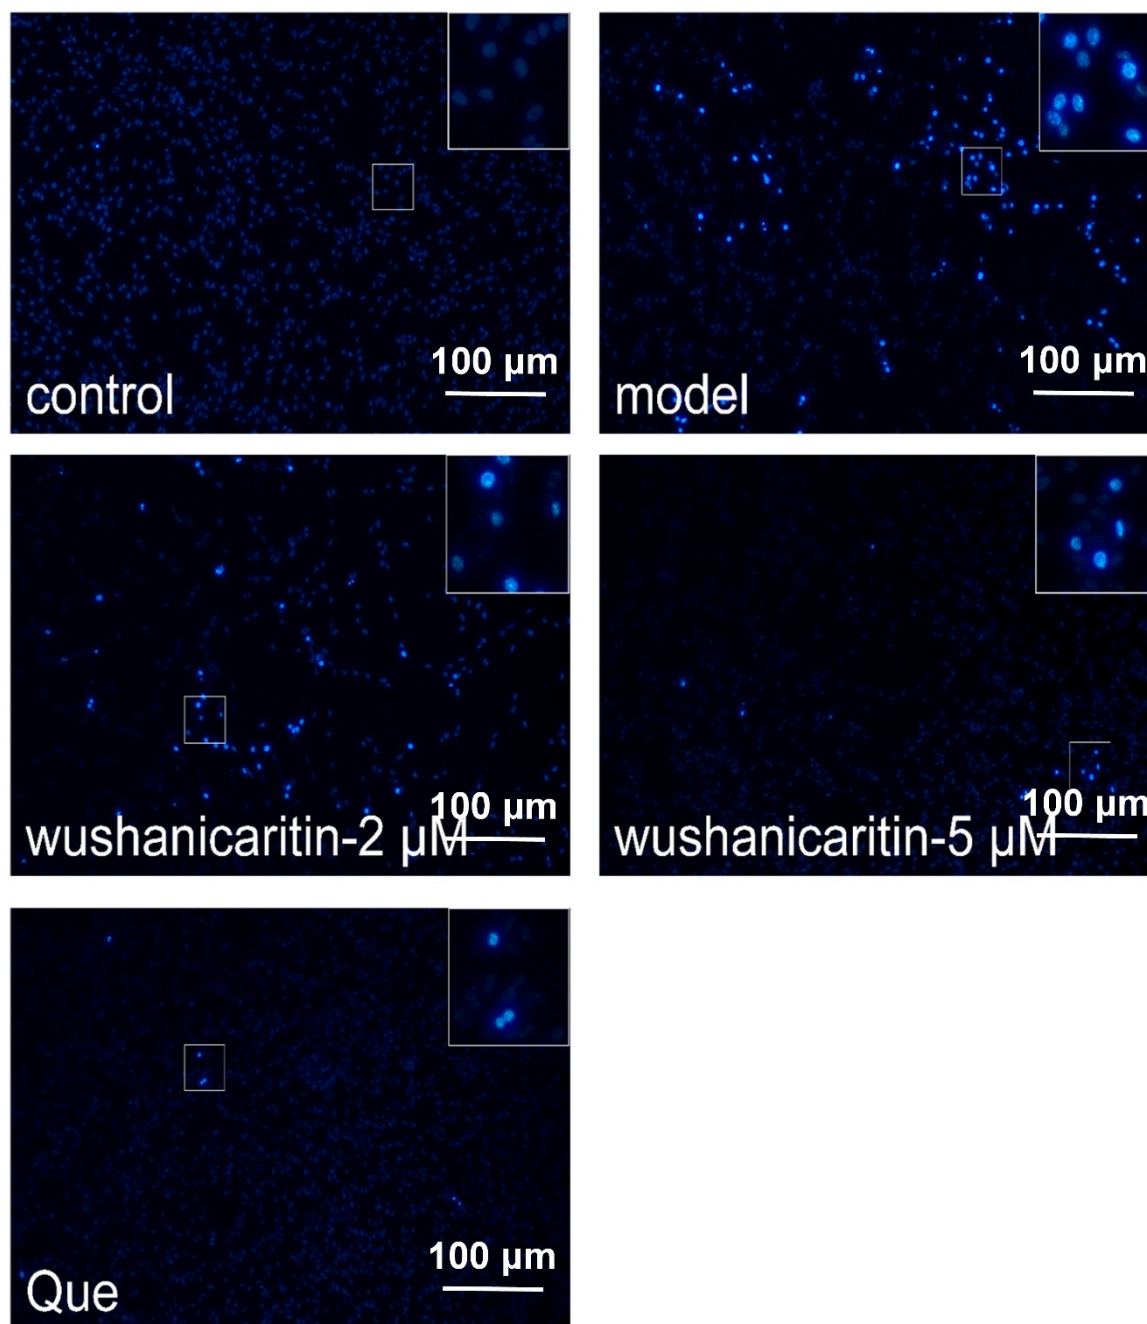

**Figure S1.** Effects of wushanicaritin and quercetin on the morphology of nuclear chromatin in PC12 cells. Control group refers to PC-12 cells with vehicle treatment (0.1% DMSO); Model group refers to PC-12 cells treated with glutamate; wushanicaritin-2  $\mu\text{M}$ , wushanicaritin-5  $\mu\text{M}$  and Que refers to PC-12 cells co-treated with glutamate and wushanicaritin at concentrations of 2, 5  $\mu\text{M}$ , or quercetin (30  $\mu\text{M}$ ), respectively. Scale bar=100  $\mu\text{m}$ .
